# Supplementary material for: Endowing graphene with superior cation/anion co-purification and visible photocatalysis performances by in situ deposition of silver compounds
Source: Royal Society of Chemistry journal article supplement (doi:10.1039/c7ta06107b), 2017-01-01
Supplement: c7ta06107b1.pdf [file c7ta06107b1.pdf]

## Supporting Information

### **Endowing rGO Superior Cations/Anions Co-purification and Visible Photocatalysis Performances by In-Situ Deposition of Silver Compound**

Ye Xiong,<sup>a</sup> Chao Wang,<sup>a</sup> Hanwei Wang,<sup>a</sup> Chunde Jin,<sup>a</sup> Qingfeng Sun<sup>\*a</sup> and Xijin Xu<sup>\*b</sup>

a. School of Engineering, Zhejiang A & F University, Hangzhou, Zhejiang Province, 311300, PR China

b. Key Laboratory of Wood Science and Technology, Zhejiang Province, 311300, PR China.

**\*Corresponding author:** Qingfeng Sun and Xijin Xu

E-mail: qfsun@zafu.edu.cn, sps\_xuxj@ujn.edu.cn

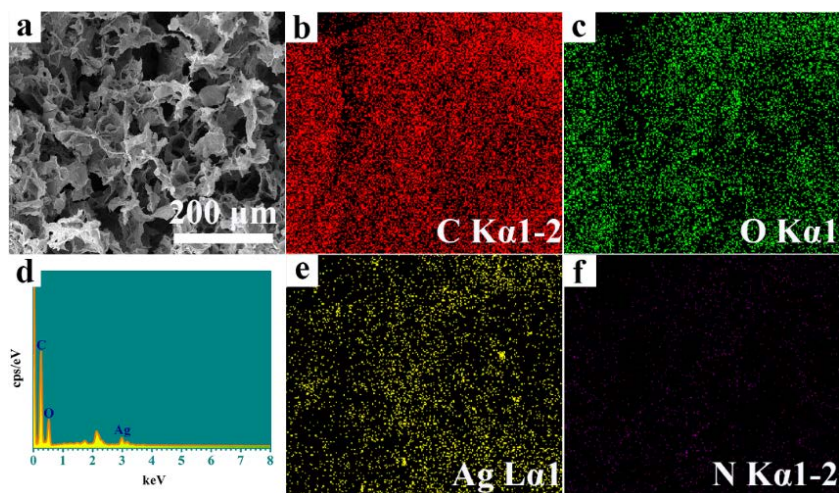

**Figure S1.** (a) SEM image of Ag<sub>2</sub>O/rGO, (d) EDS spectrum of Ag<sub>2</sub>O/rGO aerogel and the corresponding elemental mapping images: (b) C; (c) O; (e) Ag; (f) N.

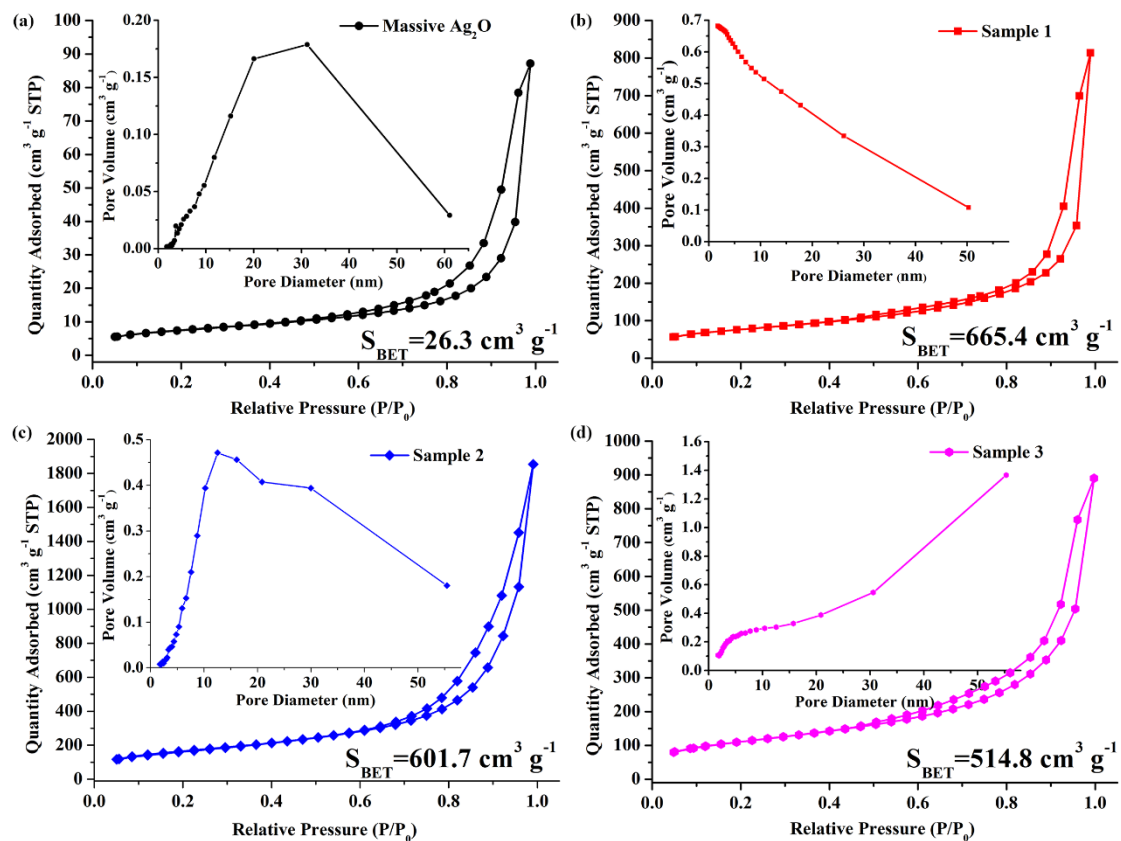

**Figure S2.**  $N_2$  adsorption-desorption isotherms of the massive  $Ag_2O$  and sample A1-A3, respectively.

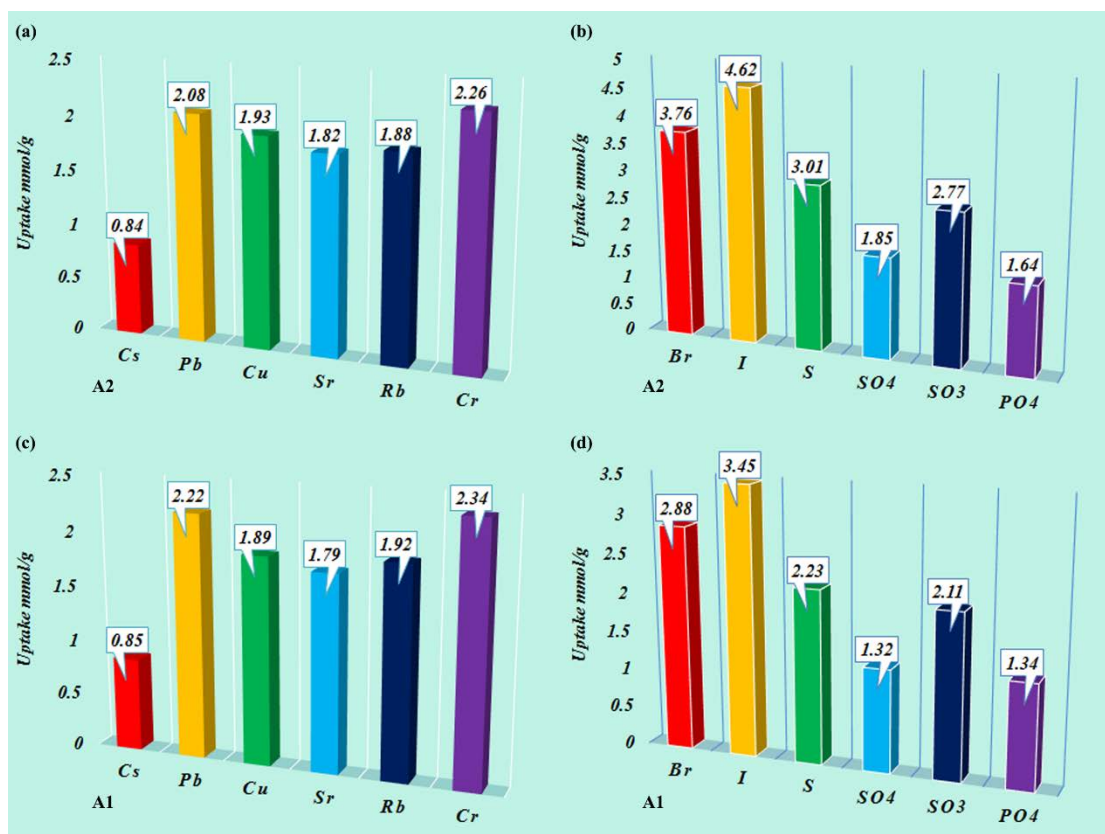

**Figure S3.** (a) and (c) Cationic adsorption performance of samples A2 and A1, respectively. (b) and (d) Anionic adsorption performance of samples A2 and A1, respectively.

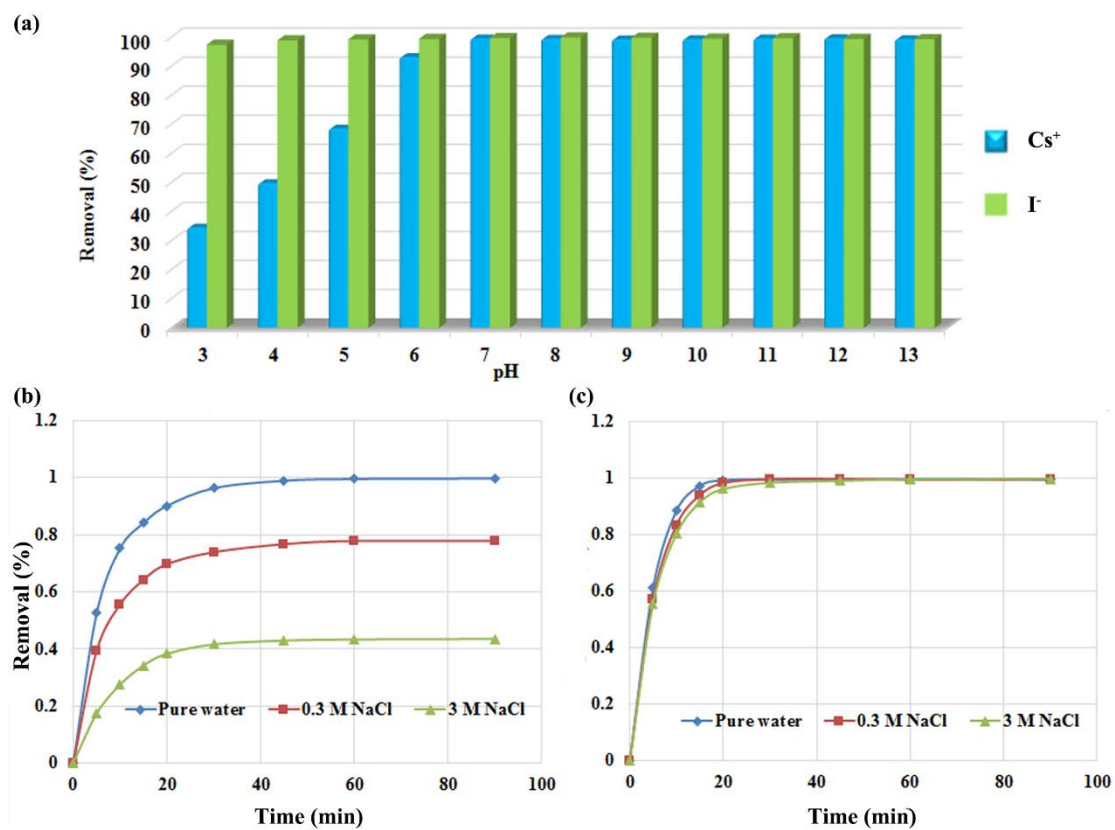

**Figure S4.** (a) Co-purification performances of Cationic  $\text{Cs}^+$  and anionic  $\text{I}^-$  by sample 3 in the pH range of 3~11. (b) and (c) Competitive adsorption of Cationic  $\text{Cs}^+$  and anionic  $\text{I}^-$  on  $\text{Ag}_2\text{O}/\text{rGO}$  aerogels.

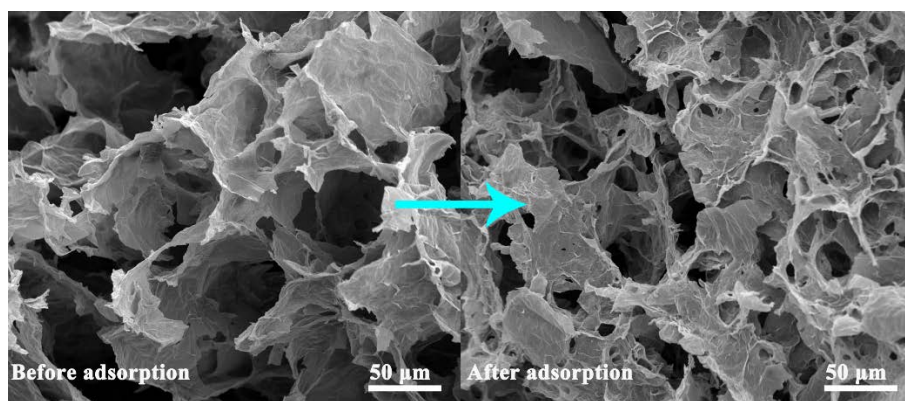

**Figure S5.** Morphology of the Ag<sub>2</sub>O/rGO aerogel before and after adsorption.

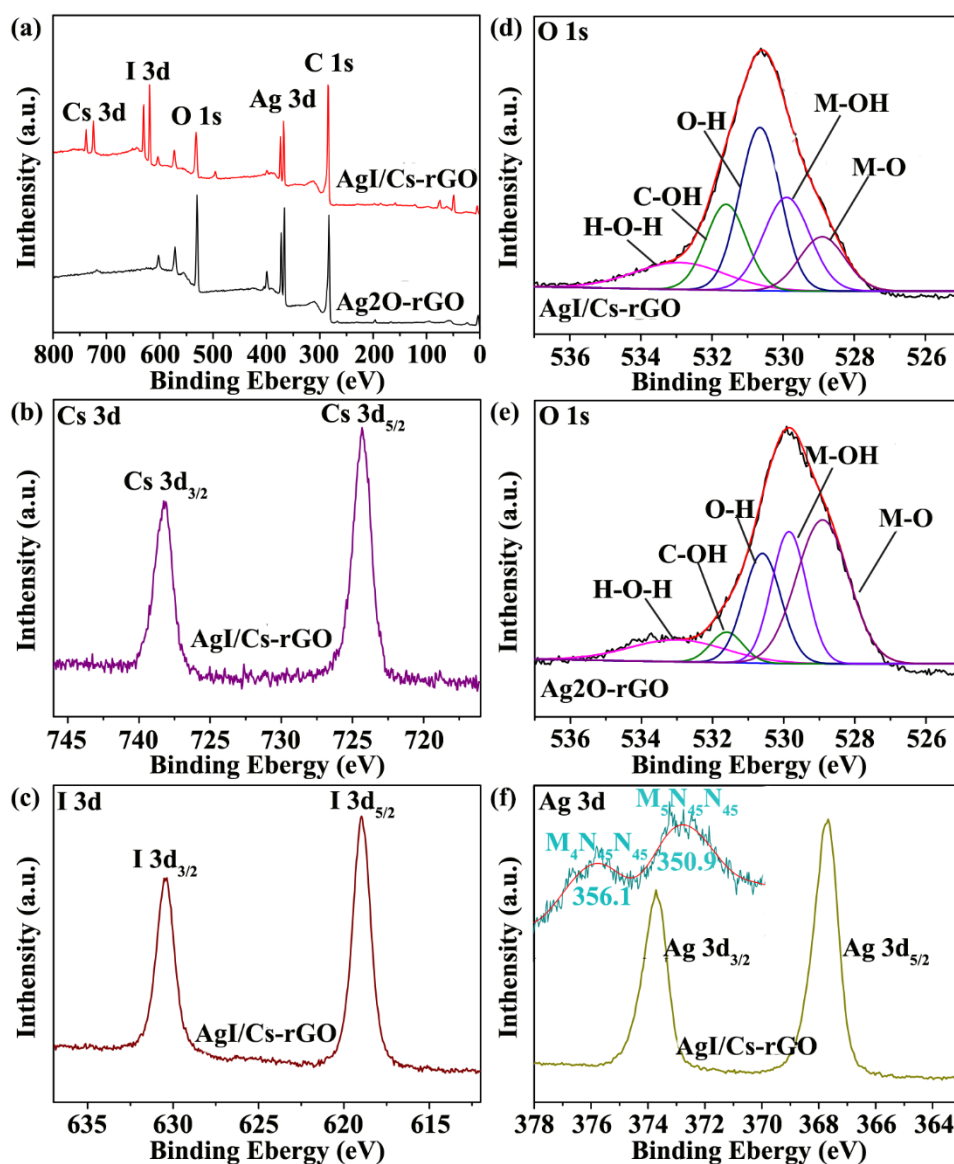

**Figure S6.** XPS spectra of the  $\text{Ag}_2\text{O}/\text{rGO}$  hybrid aerogel before and after co-capturing  $\text{Cs}^+$  and  $\text{I}^-$ : **(a)** survey spectrum; **(b)**  $\text{Cs 3d}$ ; **(c)**  $\text{I 3d}$ ; **(d)** and **(e)**  $\text{O 1s}$ ; **(f)**  $\text{Ag 3d}$ , inside:  $\text{Ag MNN}$ .

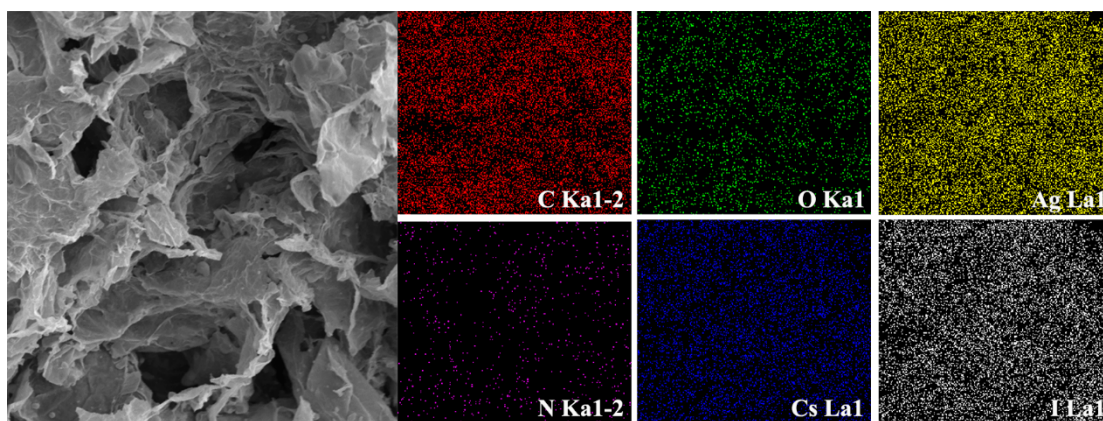

**Figure S7.** Energy mapping images of  $\text{Ag}_2\text{O}/\text{rGO}$  aerogels after treated with  $\text{CsI}$  solution for 48 h.



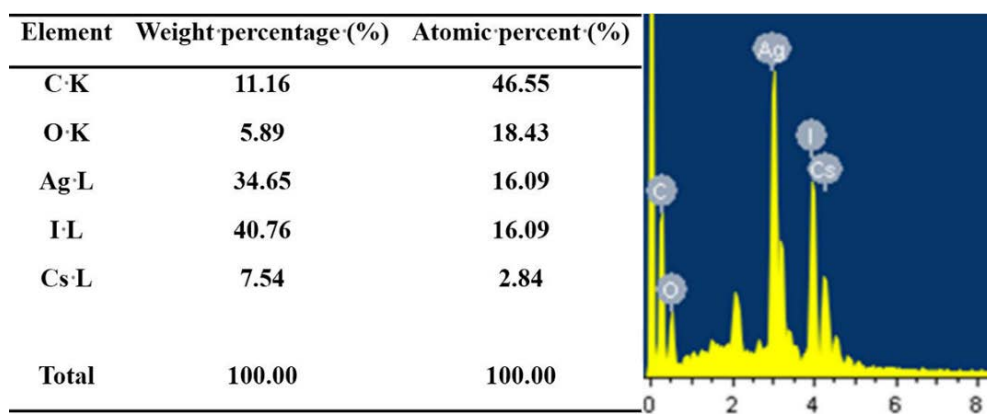

**Figure S8.** The energy spectrum of the Ag<sub>2</sub>O/rGO hybrid aerogel after co-capturing Cs<sup>+</sup> and I<sup>-</sup>.

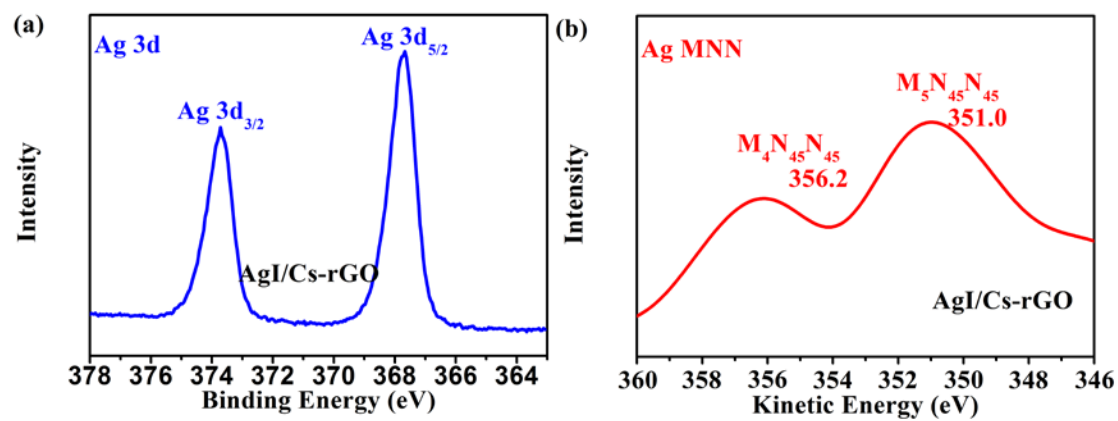

Figure S9. XPS spectra of the Ag<sub>2</sub>O/rGO hybrid aerogel after light irradiating.

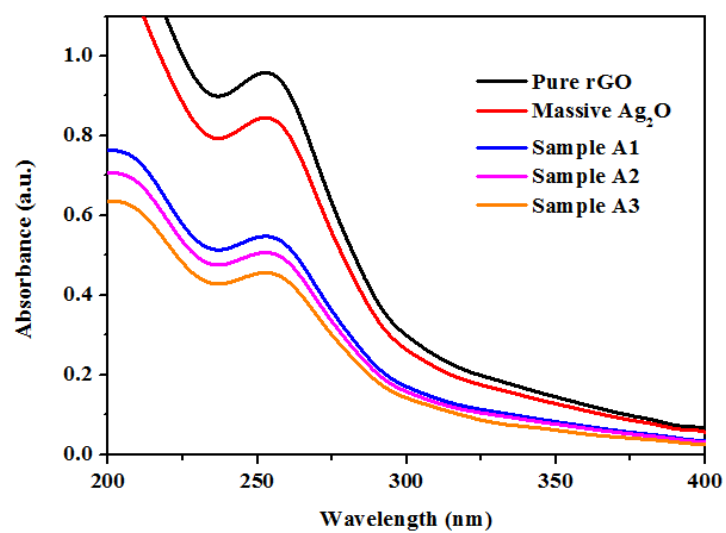

**Figure S10.** NBT transformation absorbance spectra over pure rGO, massive  $\text{Ag}_2\text{O}$ , and sample A1-3 for 4 h, respectively.

**Table S1.** The specific surface areas and pore size distribution of those samples.

| Samples                       | $S_{\text{BET}}$ ( $\text{cm}^3 \text{ g}^{-1}$ ) | Pore volume ( $\text{cm}^3 \text{ g}^{-1}$ ) |
|-------------------------------|---------------------------------------------------|----------------------------------------------|
| Massive $\text{Ag}_2\text{O}$ | 26.3                                              | 0.11                                         |
| Sample 3                      | 665.4                                             | 0.39                                         |
| Sample 2                      | 601.7                                             | 0.28                                         |
| Sample 1                      | 514.8                                             | 0.64                                         |

**Table S2.** The relevant element compound of those samples.

| Samples  | Atomic %<br>(C) | Atomic %<br>(Ag) | Atomic %<br>(N) | Atomic %<br>(O) | Mass ratio of<br>Ag <sub>2</sub> O to rGO |
|----------|-----------------|------------------|-----------------|-----------------|-------------------------------------------|
| rGO      | 77.49           | -                | 7.52            | 14.99           | -                                         |
| Sample 3 | 71.89           | 1.47             | 3.09            | 23.55           | 0.104                                     |
| Sample 2 | 71.09           | 3.18             | 3.17            | 22.56           | 0.297                                     |
| Sample 1 | 70.19           | 4.75             | 2.97            | 22.09           | 0.457                                     |

**Table S3.** The adsorption capacities in comparison with previous work.

| Adsorbents                                        | Adsorption Element | Removal Capacity (mmol/g) | Reference |
|---------------------------------------------------|--------------------|---------------------------|-----------|
| K-Merlinoite                                      | Sr <sup>2+</sup>   | 0.50                      | Ref. 35   |
|                                                   | Cs <sup>+</sup>    | 0.75                      |           |
| MWCNT reinforced Zeolite-A beads                  | Sr <sup>2+</sup>   | 1.22                      | Ref. 36   |
|                                                   | Cs <sup>+</sup>    | 0.85                      |           |
| Titanate nanofibers                               | Cs <sup>+</sup>    | 0.55                      | Ref. 23   |
|                                                   | I <sup>-</sup>     | 3.04                      |           |
| Titanate nanofibers                               | Sr <sup>2+</sup>   | 0.63                      | Ref. 37   |
| Layered Double Hydroxides                         | I <sup>-</sup>     | 3.72                      | Ref.38    |
| Anion-exchange membranes                          | Br <sup>-</sup>    | 0.438                     | Ref. 39   |
| Chitosan-based anionic exchanger                  | Br <sup>-</sup>    | 0.72                      | Ref. 40   |
| $\delta$ -Bi <sub>2</sub> O <sub>3</sub> aerogels | I <sup>-</sup>     | 2.04                      | Ref. 7    |
| Ag <sub>2</sub> O/rGO aerogel                     | Sr <sup>2+</sup>   | 1.75                      | This work |
|                                                   | Cs <sup>+</sup>    | 0.86                      |           |
|                                                   | Br <sup>-</sup>    | 5.24                      |           |
|                                                   | I <sup>-</sup>     | 4.32                      |           |
